# Supplementary material
Source: HighWire-hosted journal article supplement (https://jnis.bmj.com/highwire/filestream/172914/field_highwire_adjunct_files/0/jnis-2022-019202supp001_data_supplement.pdf)
Supplement: jnis-2022-019202supp001_data_supplement.pdf [file jnis-2022-019202supp001_data_supplement.pdf]

**Supplemental table 1** Symptom improvement by cranial nerve

|                              | Improved | Not improved | P value |
|------------------------------|----------|--------------|---------|
| Cranial neuropathies overall | 72       | 17           |         |
| Cranial nerve II             | 12 (17)  | 10 (59)      | 0.001   |
| Cranial nerve III            | 23 (32)  | 4 (24)       | 0.571   |
| Cranial nerve IV             | 0 (0)    | 1 (6)        | 0.191   |
| Cranial nerve V              | 10 (14)  | 0 (0)        | 0.198   |
| Cranial nerve VI             | 27 (38)  | 2 (12)       | 0.048   |

**Supplemental table 2** Previous studies reporting cranial neuropathy after flow diversion treatment

| References                         | No. of patients | Mean follow-up* | Improvement   | Improvement of each cranial neuropathy |               |              |
|------------------------------------|-----------------|-----------------|---------------|----------------------------------------|---------------|--------------|
|                                    |                 |                 |               | II                                     | III + IV + VI | V            |
| Tachi et al., 2020 <sup>26</sup>   | 18              | 12              | 10/18 (56%)   | 3/5 (60%)                              | 7/14 (50%)    |              |
| Wang et al., 2019 <sup>14</sup>    | 22              | 25.5 (24-30)    | 12/22 (54%)   | 9/19 (47%)                             | 5/7 (71%)     |              |
| Oishi et al., 2018 <sup>16</sup>   | 40              | 13.5 (1-45)     | 18/40 (45%)   | 3/10 (30%)                             | 15/28 (54%)   | 0/2 (0%)     |
| Miyachi et al., 2017 <sup>8</sup>  | 6               | 6               | 5/6 (83%)     | NA                                     | NA            |              |
| Silva et al., 2017 <sup>9</sup>    | 64              | NA              | 45/64 (71%)   | 45/64 (71%)                            |               |              |
| Brown et al., 2016 <sup>11</sup>   | 45              | 8.4 (0.1-21.5)  | 30/45 (67%)   | 6/10 (60%)                             | 30/35 (86%)   |              |
| Sahlein et al., 2015 <sup>13</sup> | 39              | 6               | 25/39 (64%)   | 9/17 (53%)                             | 17/27 (63%)   | 1/3 (33%)    |
| Moon et al., 2014 <sup>12</sup>    | 20              | 7 (4-28)        | 15/20 (75%)   | 2/3 (67%)                              | 13/16 (81%)   | 3/4 (75%)    |
| Tanweer et al., 2014 <sup>27</sup> | 19              | NA              | 16/19 (84%)   | NA                                     | NA            |              |
| Zanaty et al., 2014 <sup>10</sup>  | 51              | 14.5 (2.2-26.8) | 47/51 (92%)   | NA                                     | NA            |              |
| Szikora et al., 2013 <sup>25</sup> | 16              | NA (12-18)      | 15/16 (94%)   | NA                                     | NA            |              |
| O'Kelly et al., 2013 <sup>24</sup> | 27              | NA              | 18/27 (67%)   | 5/9 (56%)                              | 13/18 (72%)   |              |
| Current study                      | 77              | 40 (12-72)      | 62/77 (81%)   | 12/22 (55%)                            | 50/57 (88%)   | 10/10 (100%) |
| Total                              | 444             |                 | 318/444 (72%) | 94/159 (59%)                           | 150/202 (74%) | 14/19 (74%)  |

\*Expressed in months with range in parentheses. If range is not specified, all cases were evaluated at the time noted.

**Supplemental Table 3** Univariate analysis for predictors of aneurysmal regression

| Variables                  | + regression | - regression | P value  |
|----------------------------|--------------|--------------|----------|
| No. of patients            | 33           | 33           |          |
| Age >65 yrs                | 20 (61)      | 18 (55)      | 0.804    |
| Women                      | 28 (85)      | 29 (88)      | 1.000    |
| Hypertension               | 17 (52)      | 20 (61)      | 0.620    |
| Dyslipidemia               | 14 (42)      | 11 (33)      | 0.612    |
| Diabetes mellitus          | 1 (3)        | 3 (9)        | 0.613    |
| History of smoking         | 14 (42)      | 7 (21)       | 0.112    |
| Aneurysm size $\geq 20$ mm | 14 (42)      | 14 (42)      | 1.000    |
| Aneurysm neck $\geq 8$ mm  | 17 (52)      | 17 (52)      | 1.000    |
| Steroid use                | 22 (67)      | 25 (76)      | 0.587    |
| Adjunctive coiling         | 1 (3)        | 17 (52)      | < 0.0001 |
| Aneurysm occlusion*        |              |              |          |
| 6 months                   | 29 (88)      | 20 (61)      | 0.023    |
| 12 months                  | 32 (97)      | 24 (73)      | 0.013    |

Values shown are medians with interquartile range or numbers with percentage.

\*Aneurysm occlusion is defined as O'Kelly-Marotta grade C or D.

**Supplemental table 4** Relationship between volume embolization rate and resolution or improvement of cranial neuropathy in patients who underwent adjunctive coiling

| Variable       | Improved        | Unimproved       | P value |
|----------------|-----------------|------------------|---------|
| No of Patients | 9               | 9                |         |
| VER            | 11.6 (9.8-14.9) | 17.3 (13.9-23.2) | 0.0243  |
| VER<13         | 6 (67)          | 1 (11)           | 0.0498  |

Values shown are medians with interquartile range or numbers with percentage.
